# Supplementary material for: Disrupting SOD1 activity inhibits cell growth and enhances lipid accumulation in nasopharyngeal carcinoma
Source: PubMed Central journal article supplement (PMC5996554; doi:10.1186/s12964-018-0240-3), 2018-06-11
Supplement: 12964_2018_240_MOESM1_ESM.pdf [file 12964_2018_240_MOESM1_ESM.pdf]

**Table S1: Primers sequence for qPCR**

| Gene           | Sequence (5'-3')         |
|----------------|--------------------------|
| SOD1           | TGGTTTGCGTCGTAGTCTCC     |
|                | CTTCGTCGCCATAACTCGCT     |
| $\beta$ -Actin | GCACTCTTCCAGCTTCCTT      |
|                | GTTGGCGTACAGGTCTTTGC     |
| PDHE1A         | TTCTCAGAAGCCGGCAAGC      |
|                | AGCACTGTTGTGACAGGAGG     |
| CPT1A          | CCTCCAGTTGGCTTATCGTG     |
|                | TTCTTCGTCTGGCTGGACAT     |
| FASN           | AAGGACCTGTCTAGGTTTGATGC  |
|                | TGGCTTCATAGGTGACTTCCA    |
| PDK1           | TCACAGAGGAGCGTTTCTGG     |
|                | TCACTGATCCTTCCTGCTTCC    |
| ACLY           | AGTCCAGGGCCGATGAGGTGG    |
|                | GAGGGTGGTGCTCTTTCCTTGCAG |
| MCAD           | TGGATAACCAACGGAGGAAAAG   |
|                | CTGGGGTATCTGCTTCCACA     |
| E-cadherin     | ATTTTCCCTCGACACCCGAT     |
|                | TCCCAGGCGTAGACCAAGA      |
| Vimentin       | CGGGAGAAATTGCAGGAGGA     |
|                | AAGGTCAAGACGTGCCAGAG     |
| Twist          | GTCCGCAGTCTTACGAGGAG     |
|                | GCTTGAGGGTCTGAATCTTGCT   |

## Supplementary Figure 1

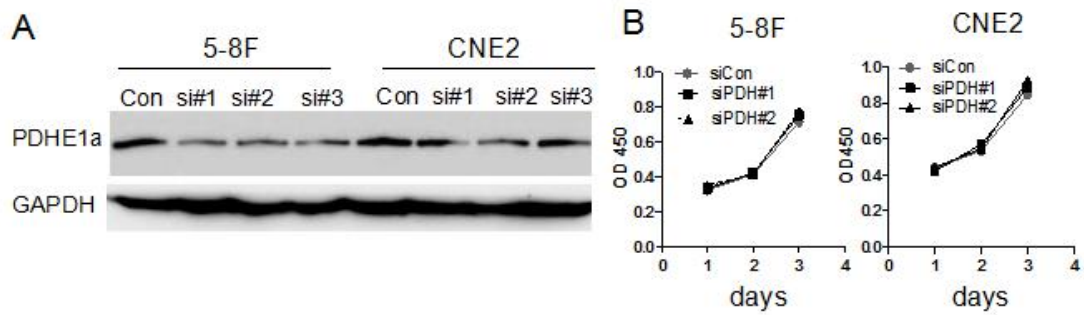

Fig.S1: **Effects of PDH on cell viability of NPC cells.** **A.** Western blot analysis of pyruvate dehydrogenase subunit E1A in 5-8F and CNE2 cells transfected with three specific siRNAs or control siRNA for 24h. **B.** Cell viability in 5-8F and CNE2 cells with PDHE1A knocked down.

## Supplementary Figure 2

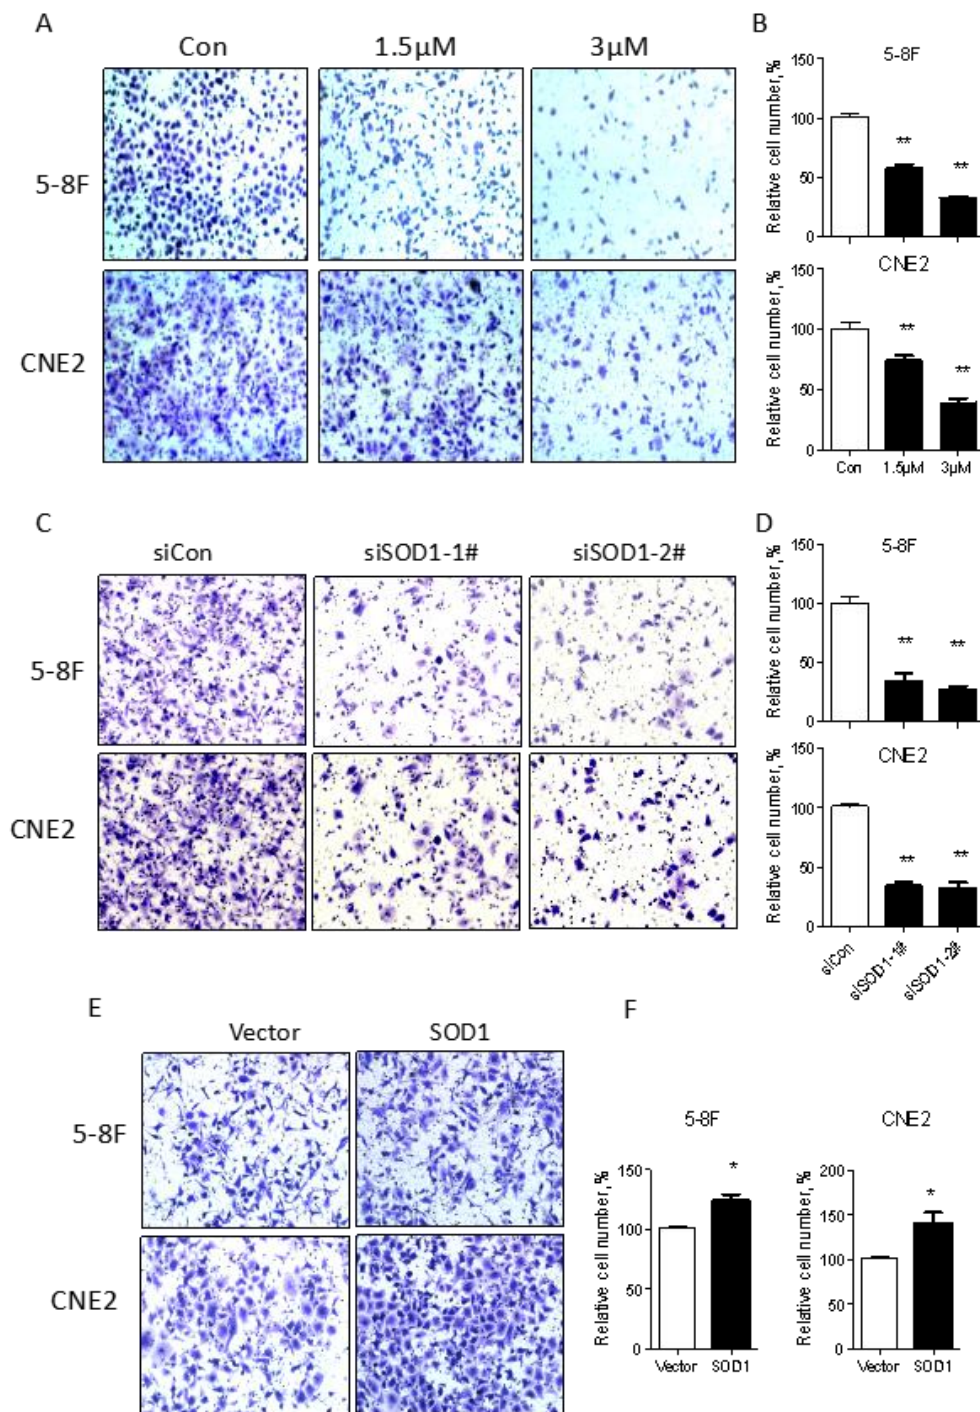

**Fig.S2: Effects of SOD1 on cell migration of NPC cells. A&B.** Migration ability of 5-8F and CNE2 cells was remarkably downregulated in LCS-1 groups compared with control group. **C&D.** Migration ability of 5-8F and CNE2 cells was remarkably downregulated in SOD1 knockdown groups compared with control group. **E&F.** Elevated SOD1 levels increased migration ability of 5-8F and CNE2 cells. All error bars represent the S.D. of three replicates from two independent experiments.

\* $p < 0.05$ , \*\* $p < 0.01$ .

### Supplementary Figure 3

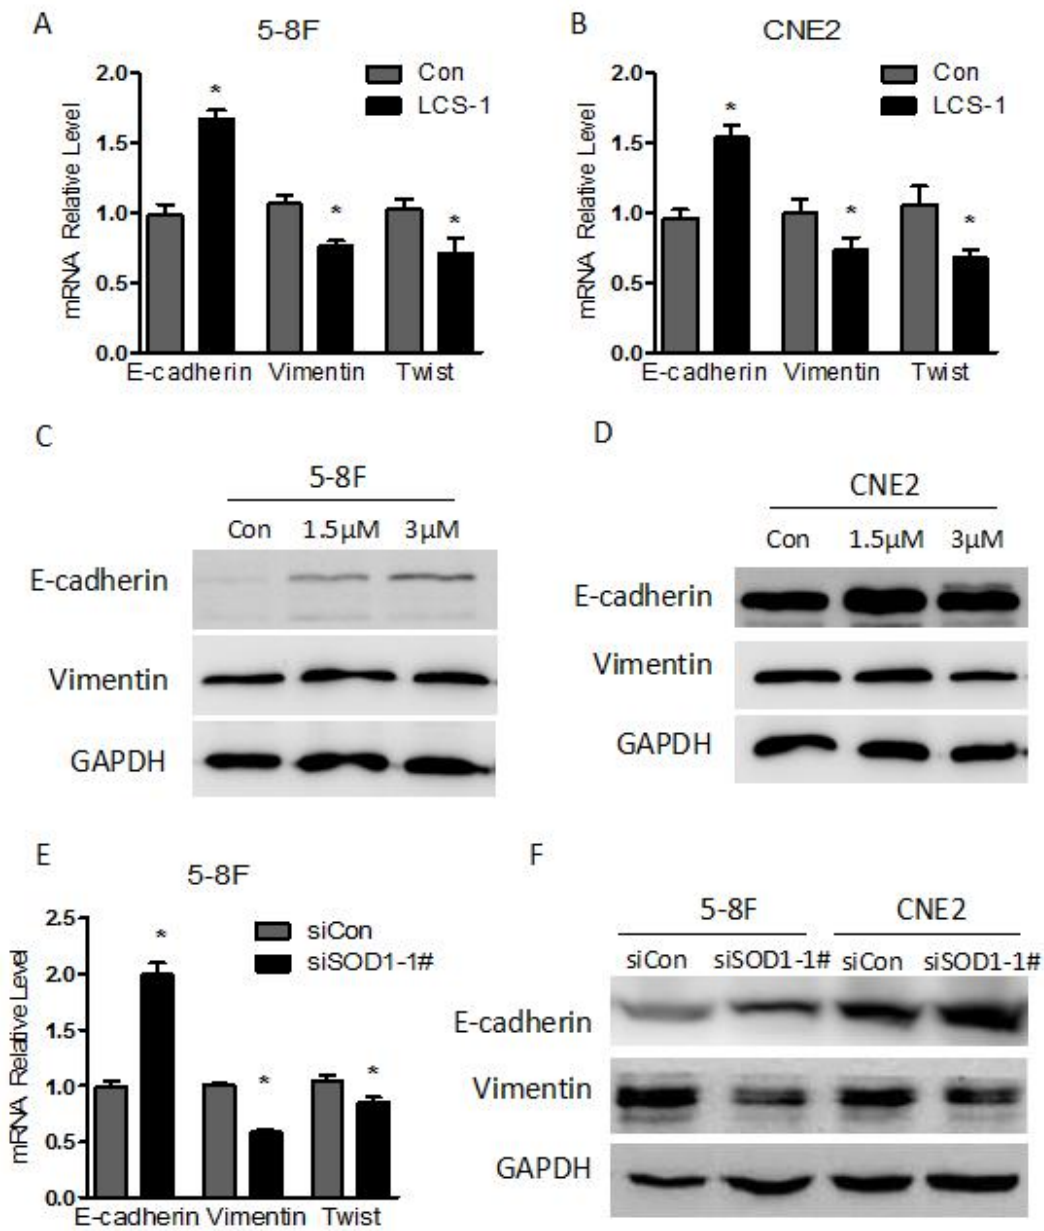

**Fig.S3: Effects of SOD1 on EMT makers of NPC cells.** Expression of vimentin and twist at the mRNA level was remarkably downregulated and the mRNA level of E-cadherin was upregulated in LCS-1 groups compared with control group in 5-8F(A) and CNE2 (B) cell for 24h. C&D. Immunoblotting analysis of E-cadherin and vimentin expression in 5-8F and CNE2 cells treated with LCS-1 for 24h. E. Expression of vimentin and twist at the mRNA level was remarkably downregulated and the mRNA level of E-cadherin was upregulated in SOD1 knockdown group compared with control group in 5-8F cell. F. Immunoblotting analysis of E-cadherin and vimentin expression in 5-8F and CNE2 cells treated with SOD1 siRNA for 24h. All error bars represent the S.D. of three replicates from two independent experiments.;\* $p < 0.05$

### Supplementary Figure 4

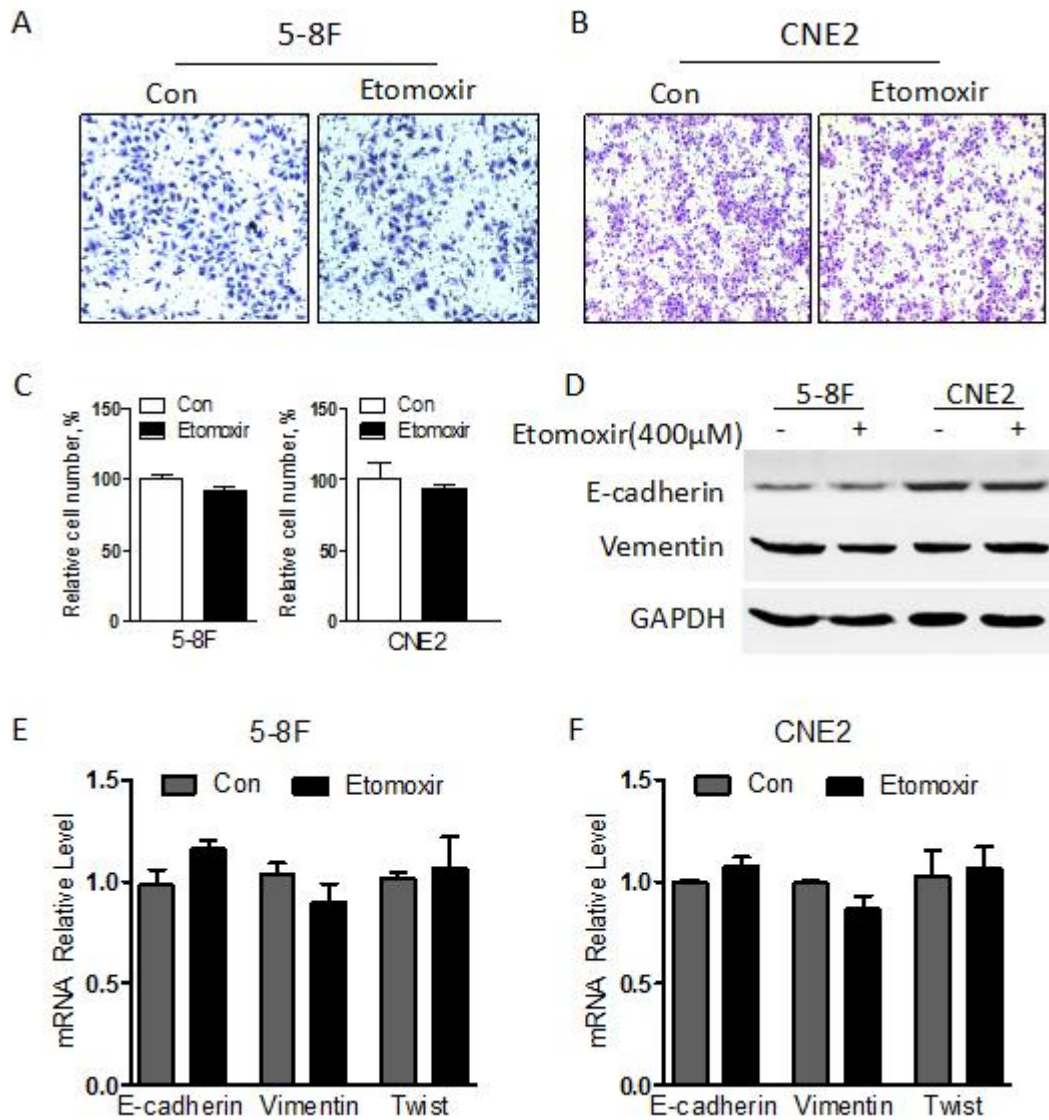

**Fig.S4: Effects of Etomoxir on cell migration of NPC cells.** Migration ability of 5-8F (A) and CNE2 cells (B) was shown in etomoxir group compared with control group for 24h. C. Quantification of the number of migration of NPC cells. D. western blot analysis of E-cadherin and vimentin expression in 5-8F and CNE2 cells treated with 400  $\mu$ M etomoxir for 24h. E&F. Expression of E-cadherin, vimentin and twist at the mRNA level in 5-8F(A) and CNE2 (B) cell for 24h.
